# Supplementary material
Source: publisher site journal article supplement (https://www.dovepress.com/article/371975)
Supplement: Supplementary file 1 [file get_supplementary_file.php]

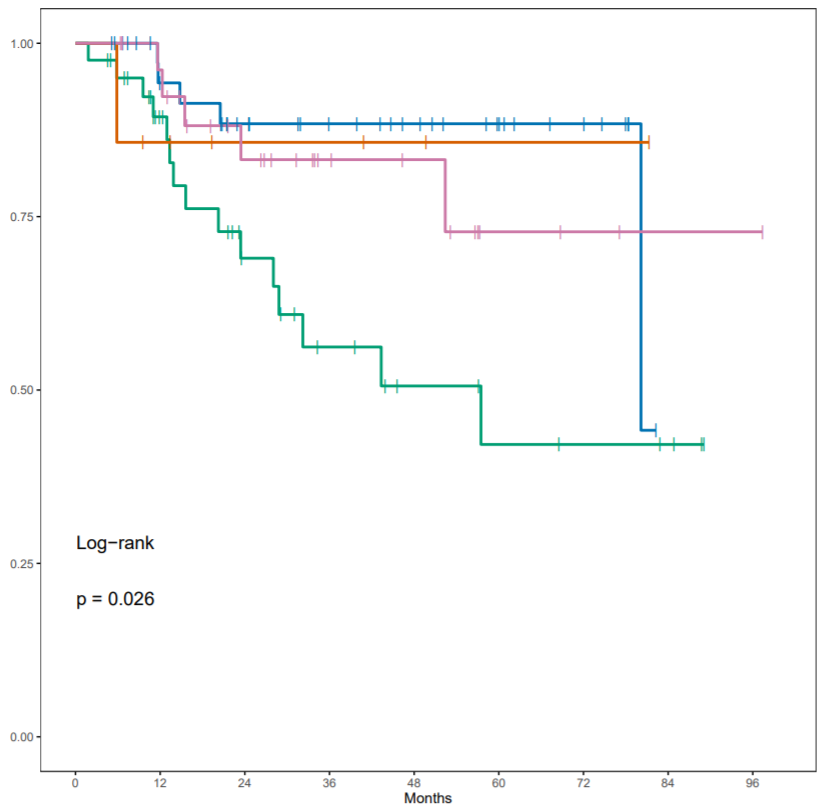


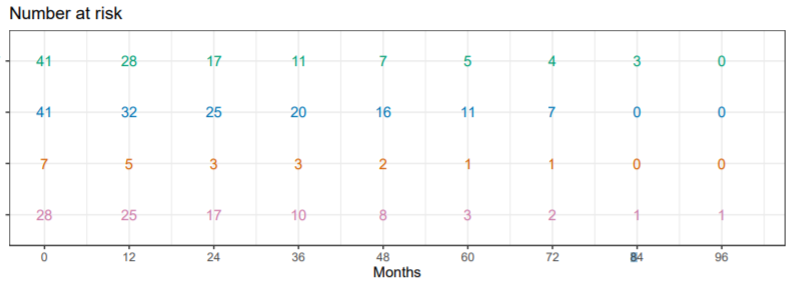


**Supplementary Fig 1** Recurrence free survival of ER+-low and ER+-Intermediate patients who received ET vs those who did not.

**Notes:** Groups: **---** ER+-low_ No_ ET, **---** ER+-low _Yes_ET, **---** ER+-Intermediate_No_ET, **---** ER+-Intermediate_Yes_ET.
